# Supplementary material
Source: Springer Nature journal article supplement (https://www.springermedizin.de/resource/supplementary/12889_2011_3763_MOESM2_ESM.pdf/9489740)

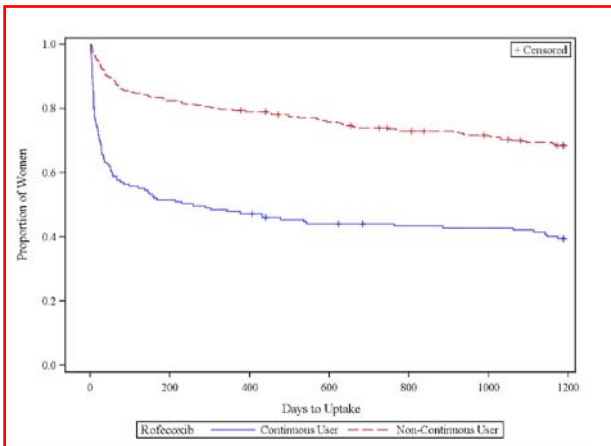

**(Log-rank Test: <math><0.0001</math>)**

Supplement: MOESM2 [file 9489740]
